# Supplementary figures and images for: Tld1 is a regulator of triglyceride lipolysis that demarcates a lipid droplet subpopulation
Source: PubMed Central journal article supplement — J Cell Biol. 2023 Oct 27;223(1):e202303026. doi: 10.1083/jcb.202303026 (PMC10609110; doi:10.1083/jcb.202303026), 2023-10-27

**D**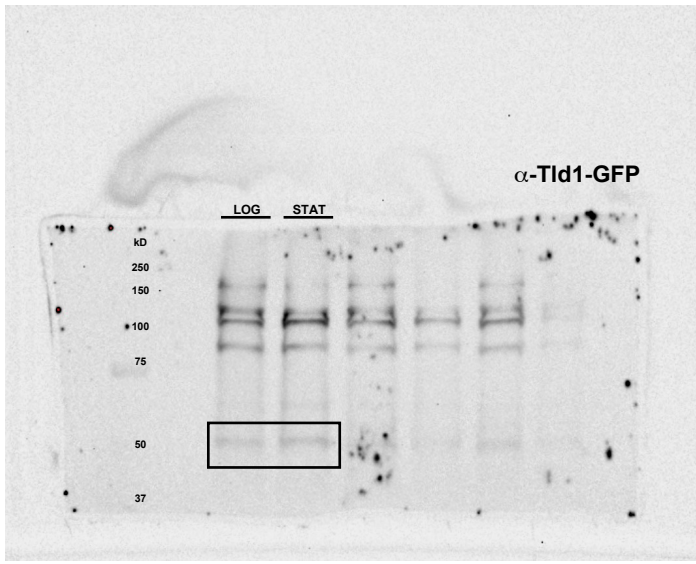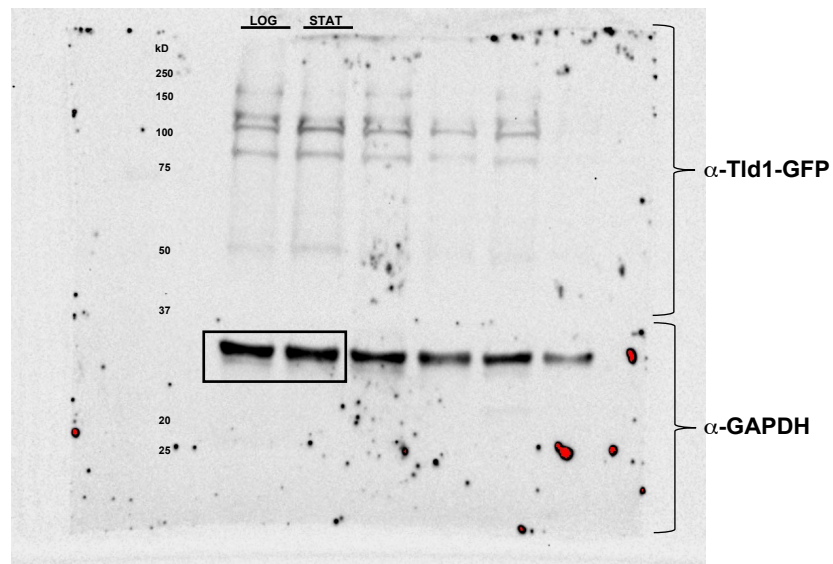**F**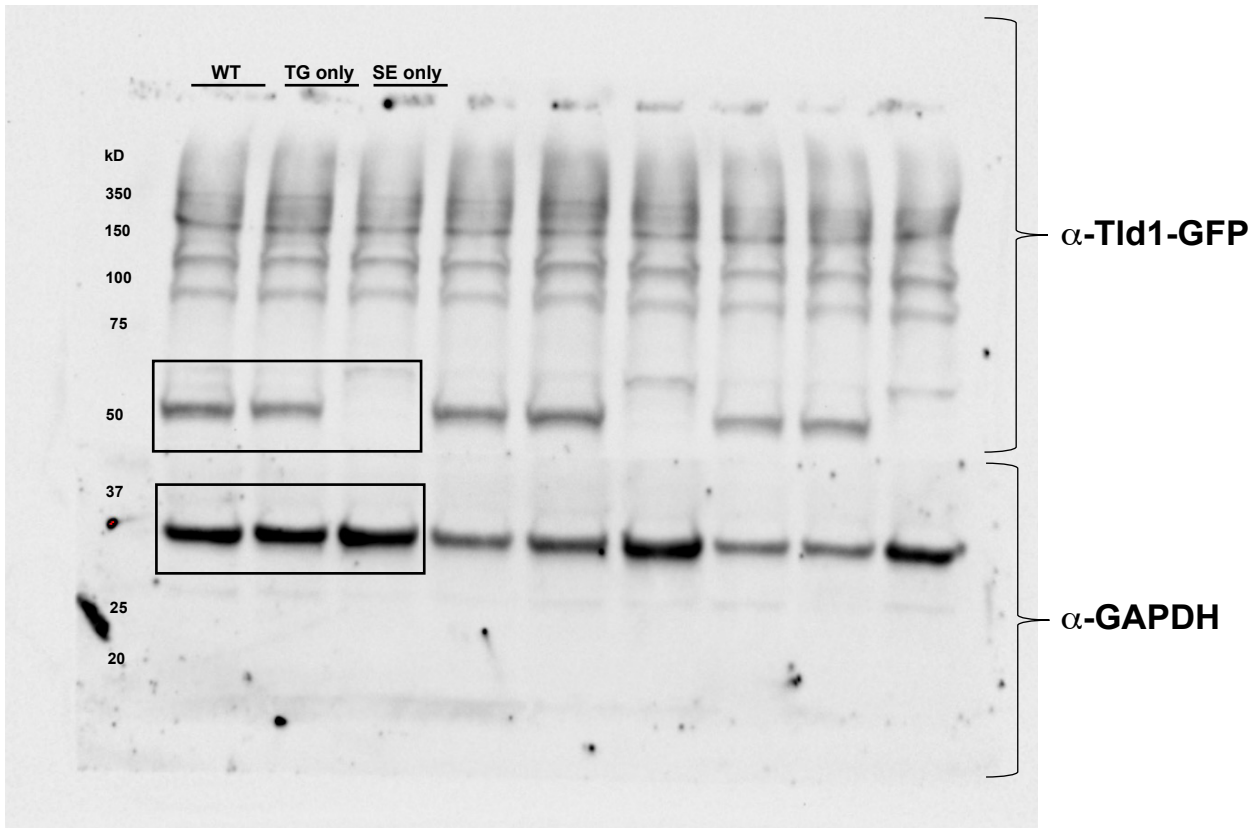

Supplement: JCB_202303026_SourceDataF1.pdf [file JCB_202303026_SourceDataF1.pdf]

F

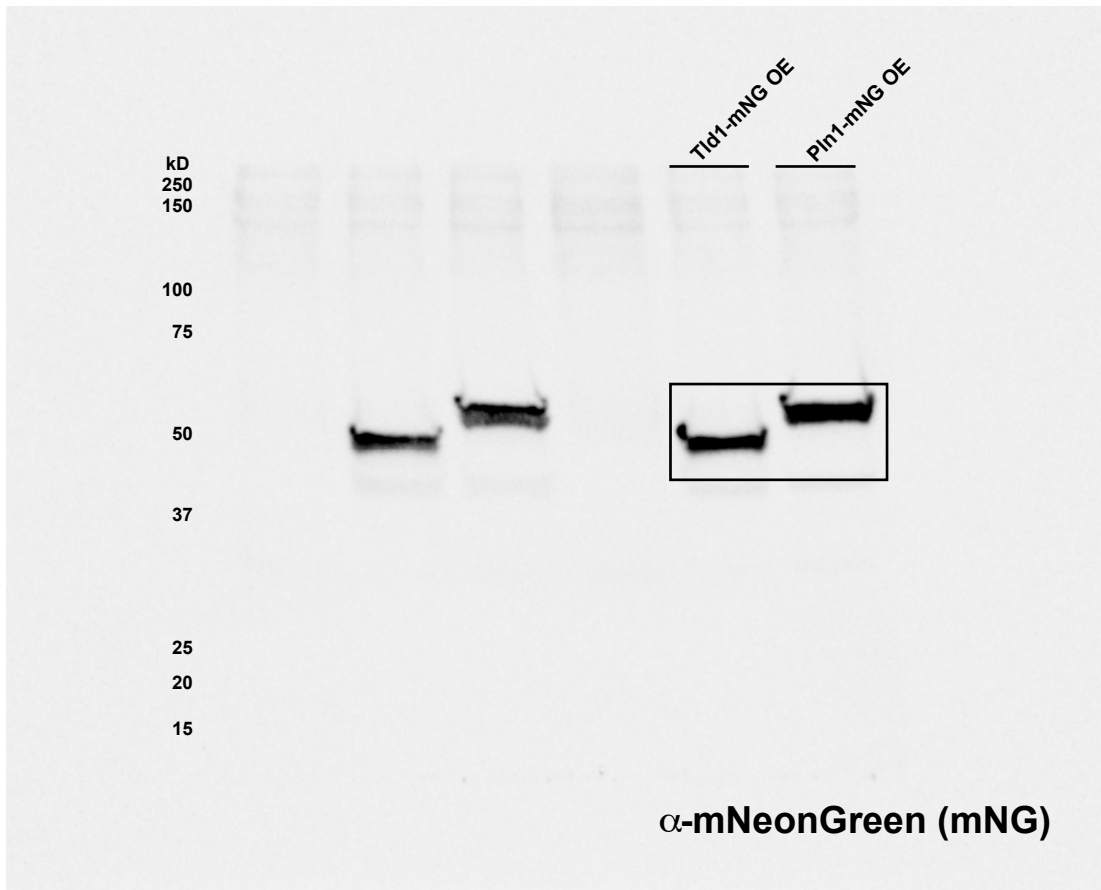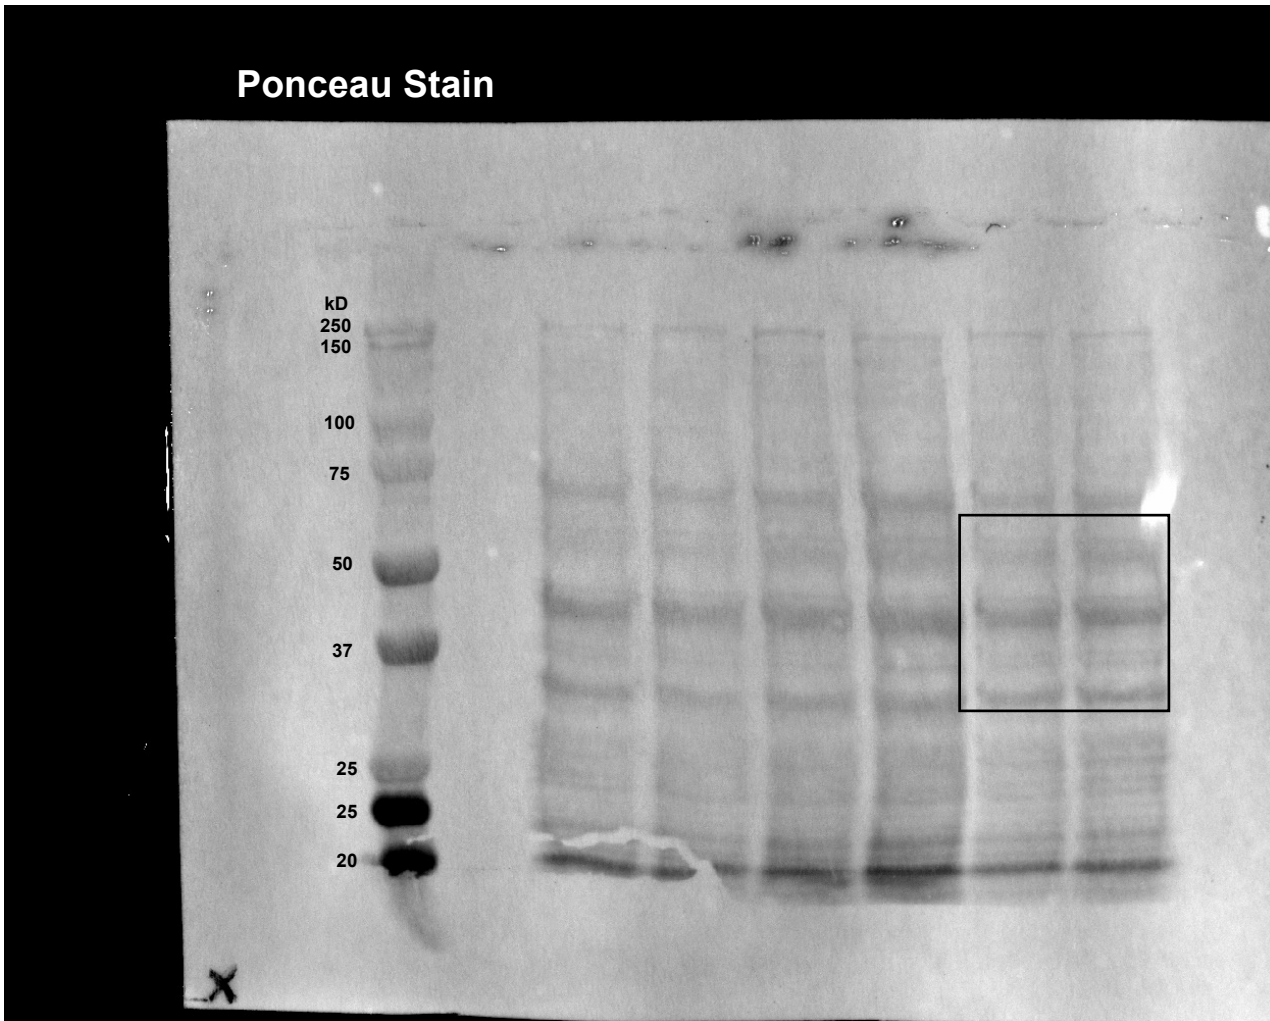

Supplement: JCB_202303026_SourceDataF7.pdf [file JCB_202303026_SourceDataF7.pdf]

**B**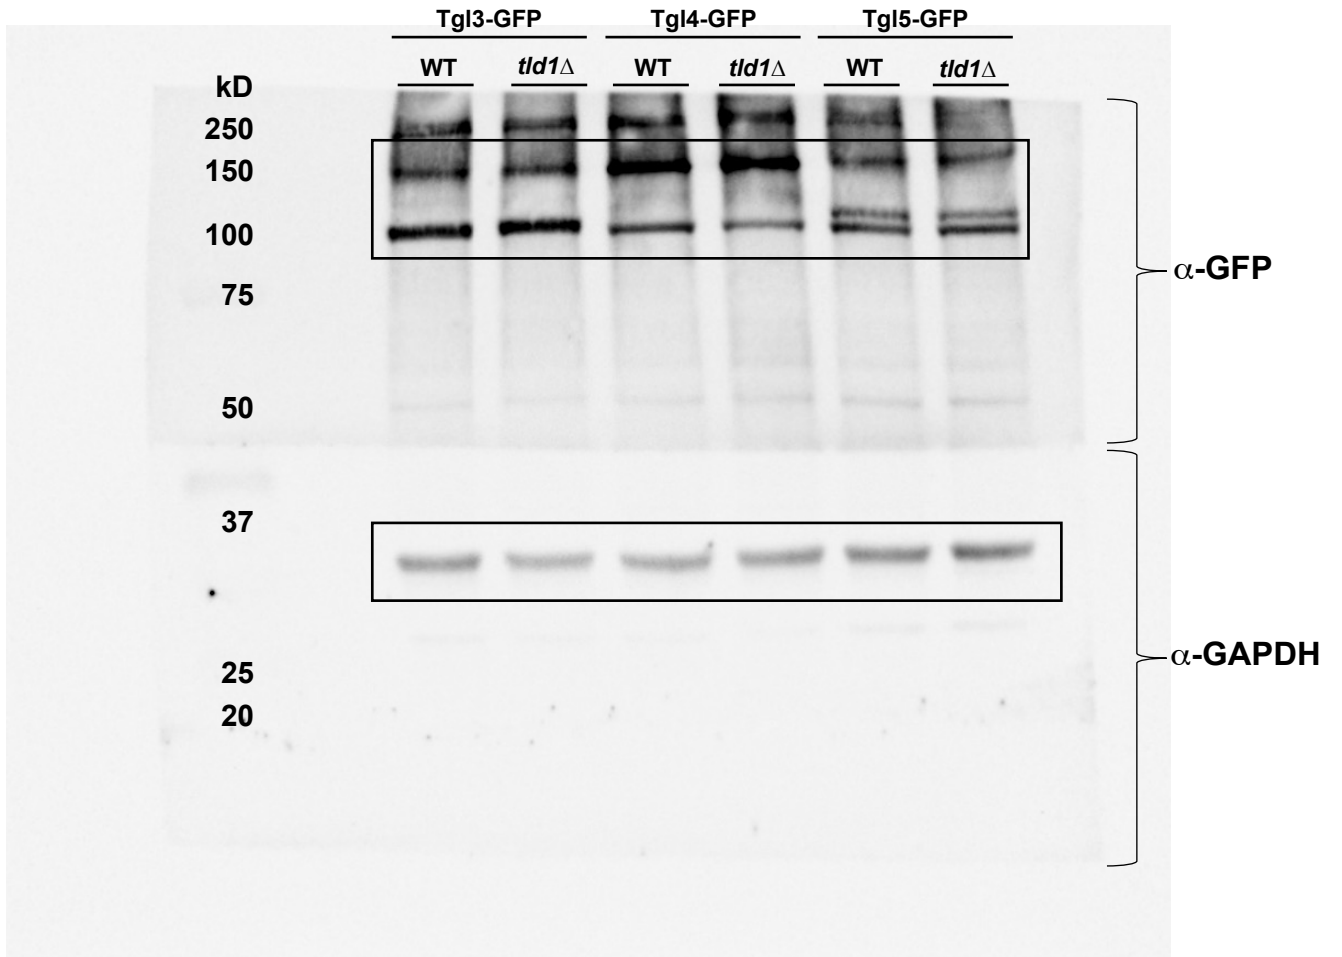**D**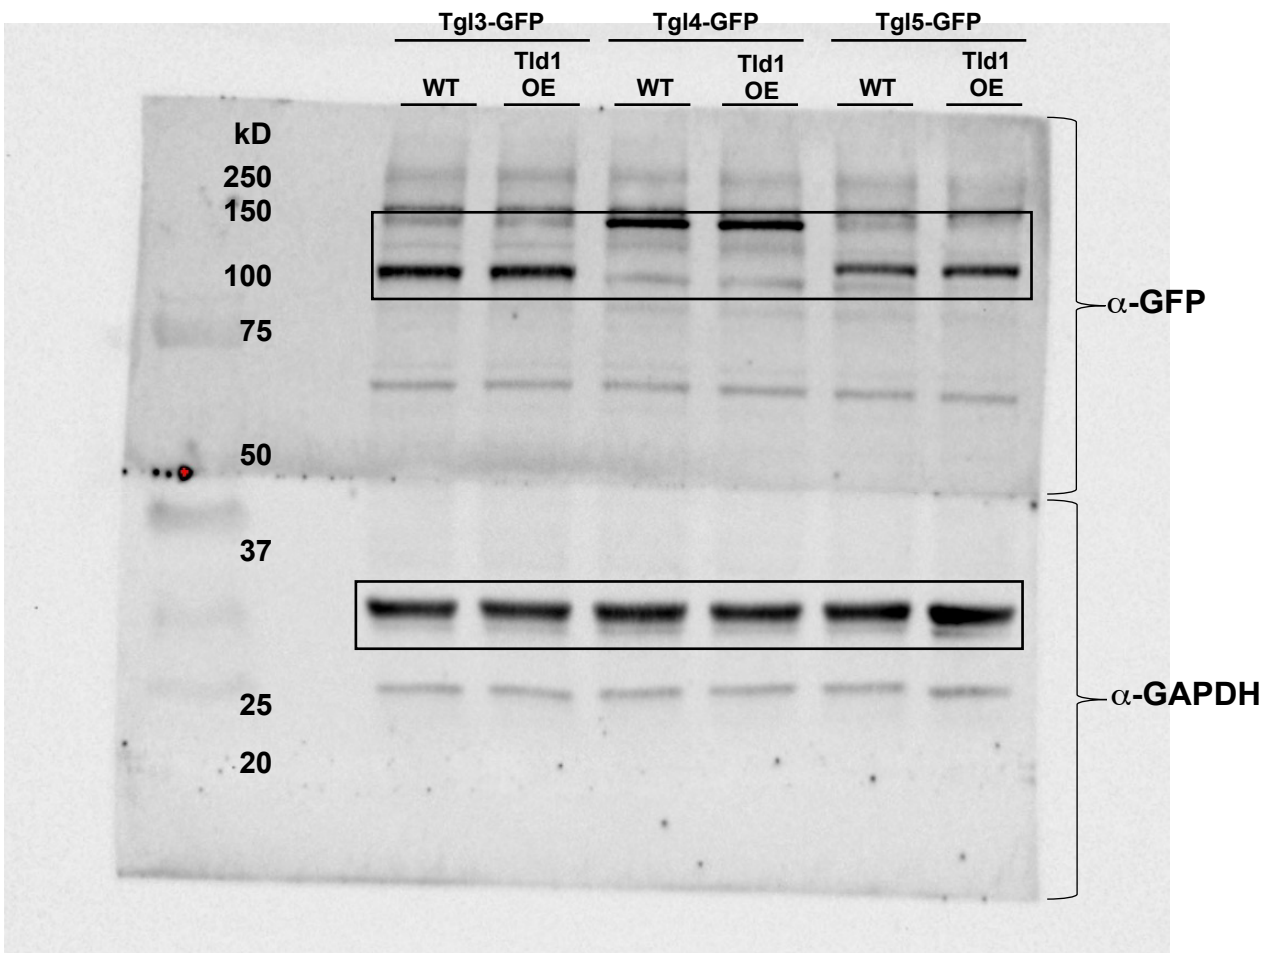

Supplement: JCB_202303026_SourceDataF8.pdf [file JCB_202303026_SourceDataF8.pdf]

A

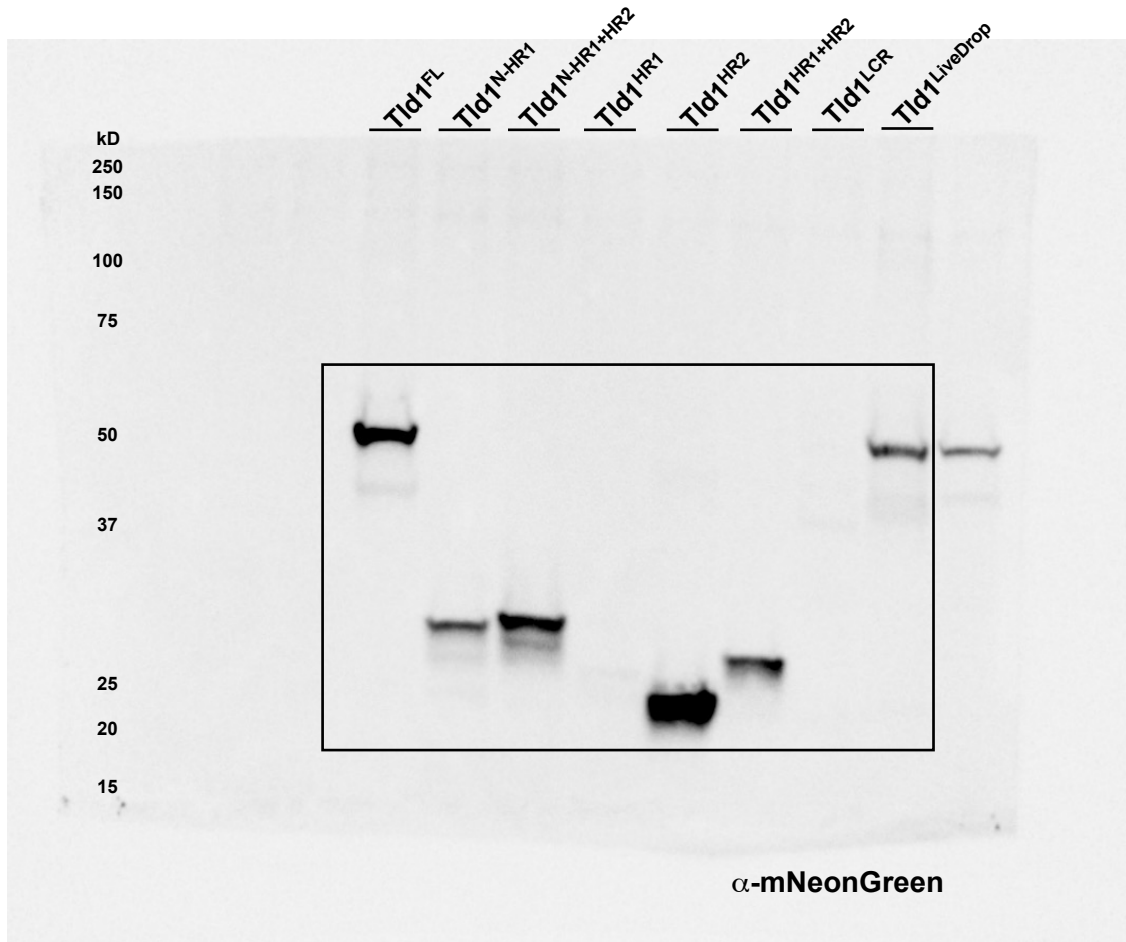

Ponceau Stain

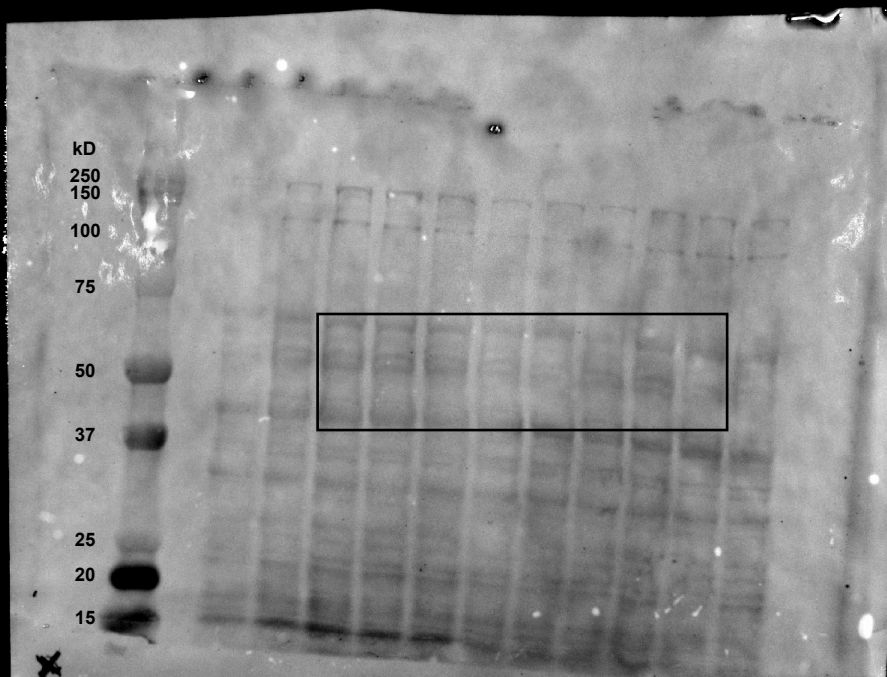

Supplement: JCB_202303026_SourceDataFS1.pdf [file JCB_202303026_SourceDataFS1.pdf]

**A**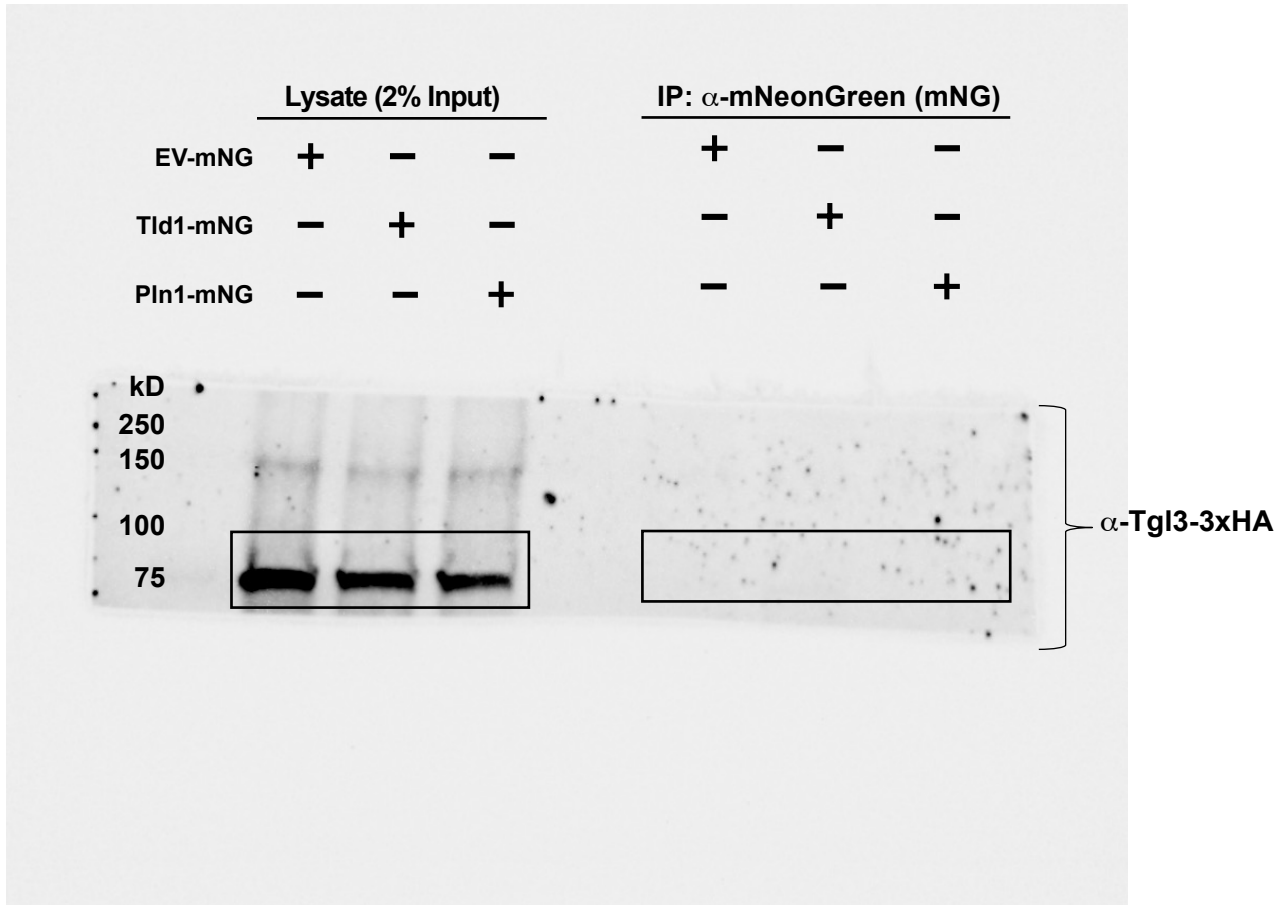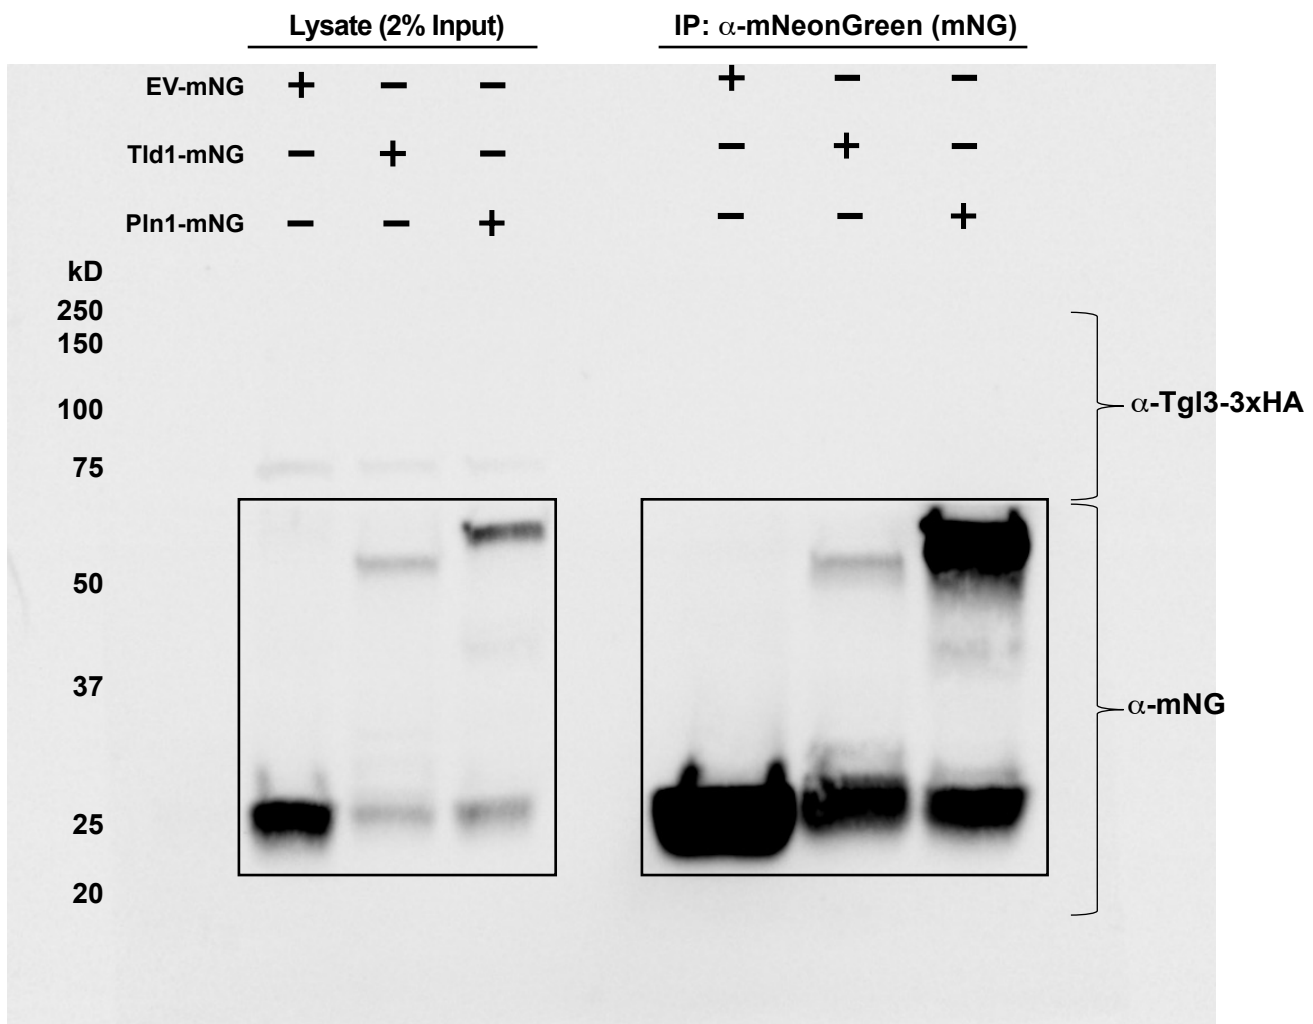

Supplement: JCB_202303026_SourceDataFS5.pdf [file JCB_202303026_SourceDataFS5.pdf]
